# Supplementary material for: The Transcriptional Regulation of Genes Involved in the Immune Innate Response of Keratinocytes Co-Cultured with Trichophyton rubrum Reveals Important Roles of Cytokine GM-CSF
Source: MDPI journal article supplement (doi:10.3390/jof8111151), 2022-10-31
Supplement: s1 [file s1]

**Table S1. Oligonucleotide sequences used for RT-qPCR analysis.**

| Gene ID        | Gene Product Name                                  | Oligonucleotide sequence        | Amplicon | Reference  |
|----------------|----------------------------------------------------|---------------------------------|----------|------------|
| <b>CSF2</b>    | Colony Stimulating Factor 2                        | F:5'-TCTGCTTGTCATCCCCTTTG-3'    | 122 pb   | [1]        |
|                |                                                    | R:5'-ATGACCATCCTGAGTTTCTAGC-3'  |          |            |
| <b>RNASE7</b>  | Ribonuclease A Family Member 7                     | F:5'- GGAGTCACAGCACGAAGACCA-3'  | 235 pb   | [2]        |
|                |                                                    | R:5'- CATGGCTGAGTTGCATGCTTGA-3' |          |            |
| <b>SLC11A1</b> | Natural resistance-associated macrophage protein 1 | F:5'- CATCTCCGTCTCCCAAAGTG-3'   | 144 pb   | [3]        |
|                |                                                    | R:5'- TGGATGCTTTAGAGACTTCGTG-3' |          |            |
| <b>KRT1</b>    | Keratin 1                                          | F:5'- CCTTACAGCACTCTACCAAGC-3'  | 149 pb   | [3]        |
|                |                                                    | R:5'-TCTGGGCTATATCCTCGTACTG-3'  |          |            |
| <b>FLG</b>     | Filaggrin                                          | F:5'- AGCAATCGGTAAATAGGTCTGG-3' | 126 pb   | [3]        |
|                |                                                    | R:5'- CCTCATTTTCGTGTTTGTCTGC-3' |          |            |
| <b>TLR4</b>    | Toll Like Receptor 4                               | F: 5'-TCTACAAAATCCCCGACAACC-3'  | 143 pb   | This paper |
|                |                                                    | R: 5'- TGTCTGGATTTACACCTGG-3'   |          |            |
| <b>GAPDH</b>   | Glyceraldehyde-3-phosphate dehydrogenase           | F: 5'-AATCCCATCACCATCTTCCAG-3'  | 118 pb   | [4]        |
|                |                                                    | R: 5'-GAGCCCCAGCCTTCTCCAT-3'    |          |            |
| <b>ACTB</b>    | Beta-actin                                         | F: 5'-GTTGCGTTACACCCTTTCTTG-3'  | 154 pb   | [5]        |
|                |                                                    | R: 5'-TGCTGTCACCTTCACCGTTC-3'   |          |            |
